# Supplementary material for: Weekly Fluctuations in Risk Tolerance and Voting Behaviour
Source: PLOS journal article supplement (doi:10.1371/journal.pone.0159017), 2016-07-08
Supplement: S1 (10.1371/journal.pone.0159017.s001) [file journal.pone.0159017.s001]

**S1 Table. Testing schedule for the BART experiment. Rows show times and columns show dates. Cells contain participant numbers (p1–25) and session numbers (sess1–5).**

|       | Monday<br>7th April | Tuesday<br>8th April | Wednesday<br>9th April | Thursday<br>10th April | Friday<br>11th April | WEEKEND | Monday<br>14th April | Tuesday<br>15th April | Wednesday<br>16th April | Thursday<br>17th April | Friday<br>18th April |
|-------|---------------------|----------------------|------------------------|------------------------|----------------------|---------|----------------------|-----------------------|-------------------------|------------------------|----------------------|
| 09:00 |                     |                      |                        |                        |                      |         |                      |                       |                         |                        |                      |
| 10:00 |                     | p2sess1              | p2sess2                | p2sess3                | p2sess4              |         | p2sess5              |                       |                         |                        |                      |
| 11:00 |                     |                      |                        |                        | p5sess1              |         | p5sess2              | p5sess3               | p5sess4                 | p5sess5                |                      |
| 12:00 |                     |                      | p3sess1                | p3sess2                | p3sess3              |         | p3sess4              | p3sess5               |                         |                        |                      |
| 13:00 | p1sess1             | p1sess2              | p1sess3                | p1sess4                | p1sess5              |         |                      |                       |                         |                        |                      |
| 14:00 |                     |                      |                        | p4sess1                | p4sess2              |         | p4sess3              | p4sess4               | p4sess5                 |                        |                      |
| 15:00 |                     |                      |                        |                        |                      |         |                      |                       |                         |                        |                      |
| 16:00 |                     |                      |                        |                        |                      |         |                      |                       |                         |                        |                      |
| 17:00 |                     |                      |                        |                        |                      |         |                      |                       |                         |                        |                      |
| 18:00 |                     |                      |                        |                        |                      |         |                      |                       |                         |                        |                      |
|       | 12th May            | 13th May             | 14th May               | 15th May               | 16th May             | WEEKEND | 19th May             | 20th May              | 21st May                | 22nd May               | 23rd May             |
| 09:00 | p6sess1             | p6sess2              | p6sess3                | p6sess4                | p6sess5              |         |                      |                       |                         |                        |                      |
| 10:00 |                     | p8sess1              | p8sess2                | p8sess3                | p8sess4              |         | p8sess5              |                       |                         |                        |                      |
| 11:00 |                     |                      | p10sess1               | p10sess2               | p10sess3             |         | p10sess4             | p10sess5              |                         |                        |                      |
| 12:00 | p7sess1             | p7sess2              | p7sess3                | p7sess4                | p7sess5              |         |                      |                       |                         |                        |                      |
| 13:00 |                     |                      |                        |                        | p14sess1             |         | p14sess2             | p14sess3              | p14sess4                | p14sess5               |                      |
| 14:00 |                     |                      |                        | p12sess1               | p12sess2             |         | p12sess3             | p12sess4              | p12sess5                |                        |                      |
| 15:00 |                     |                      |                        |                        | p15sess1             |         | p15sess2             | p15sess3              | p15sess4                | p15sess5               |                      |
| 16:00 |                     | p9sess1              | p9sess2                | p9sess3                | p9sess4              |         | p9sess5              |                       |                         |                        |                      |
| 17:00 |                     |                      | p11sess1               | p11sess2               | p11sess3             |         | p11sess4             | p11sess5              |                         |                        |                      |
| 18:00 |                     |                      |                        | p13sess1               | p13sess2             |         | p13sess3             | p13sess4              | p13sess5                |                        |                      |
|       | 2nd June            | 3rd June             | 4th June               | 5th June               | 6th June             | WEEKEND | 9th June             | 10th June             | 11th June               | 12th June              | 13th June            |
| 09:00 |                     |                      |                        |                        | p24sess1             |         | p24sess2             | p24sess3              | p24sess4                | p24sess5               |                      |
| 10:00 |                     |                      | p20sess1               | p20sess2               | p20sess3             |         | p20sess4             | p20sess5              |                         |                        |                      |
| 11:00 |                     |                      |                        | p22sess1               | p22sess2             |         | p22sess3             | p22sess4              | p22sess5                |                        |                      |
| 12:00 |                     | p18sess1             | p18sess2               | p18sess3               | p18sess4             |         | p18sess5             |                       |                         |                        |                      |
| 13:00 |                     |                      |                        | p23sess1               | p23sess2             |         | p23sess3             | p23sess4              | p23sess5                |                        |                      |
| 14:00 | p16sess1            | p16sess2             | p16sess3               | p16sess4               | p16sess5             |         |                      |                       |                         |                        |                      |
| 15:00 |                     |                      | p21sess1               | p21sess2               | p21sess3             |         | p21sess4             | p21sess5              |                         |                        |                      |
| 16:00 | p17sess1            | p17sess2             | p17sess3               | p17sess4               | p17sess5             |         |                      |                       |                         |                        |                      |
| 17:00 |                     |                      |                        |                        | p25sess1             |         | p25sess2             | p25sess3              | p25sess4                | p25sess5               |                      |
| 18:00 |                     | p19sess1             | p19sess2               | p19sess3               | p19sess4             |         | p19sess5             |                       |                         |                        |                      |
