# Supplementary material for: Weekly Fluctuations in Risk Tolerance and Voting Behaviour
Source: PLOS journal article supplement (doi:10.1371/journal.pone.0159017), 2016-07-08
Supplement: S2 (10.1371/journal.pone.0159017.s002) [file journal.pone.0159017.s002]

**S2 Table. BART adjusted mean scores for participants in the behavioral experiment.** Higher numbers indicate higher risk tolerance. Rows denote participant numbers, columns denote weekday. Higher numbers indicate higher risk tolerance.

| Participant | Mon   | Tue   | Wed   | Thu   | Fri   |
|-------------|-------|-------|-------|-------|-------|
| 1           | 50.00 | 52.28 | 45.00 | 45.45 | 45.83 |
| 2           | 21.63 | 11.28 | 11.64 | 13.67 | 28.67 |
| 3           | 50.00 | 37.83 | 33.33 | 43.85 | 51.67 |
| 4           | 37.08 | 38.58 | 36.15 | 34.45 | 41.08 |
| 5           | 64.00 | 51.10 | 50.08 | 50.00 | 55.45 |
| 6           | 51.11 | 42.27 | 38.75 | 31.91 | 32.50 |
| 7           | 29.67 | 36.25 | 33.07 | 36.00 | 37.14 |
| 8           | 29.57 | 31.46 | 34.00 | 29.20 | 33.85 |
| 9           | 23.44 | 22.50 | 20.00 | 18.75 | 21.17 |
| 10          | 55.41 | 47.73 | 37.69 | 46.80 | 46.33 |
| 11          | 31.80 | 51.00 | 26.31 | 25.87 | 28.06 |
| 12          | 26.88 | 31.40 | 33.64 | 18.93 | 23.43 |
| 13          | 46.81 | 45.83 | 47.33 | 35.55 | 47.07 |
| 14          | 31.43 | 30.00 | 35.71 | 38.46 | 44.23 |
| 15          | 25.69 | 23.73 | 28.67 | 23.85 | 48.00 |
| 16          | 22.94 | 33.27 | 32.50 | 36.15 | 36.15 |
| 17          | 59.66 | 32.64 | 39.46 | 38.92 | 40.15 |
| 18          | 27.13 | 24.00 | 25.44 | 25.44 | 25.88 |
| 19          | 32.33 | 45.00 | 36.15 | 38.21 | 34.61 |
| 20          | 41.54 | 45.00 | 29.67 | 35.67 | 43.07 |
| 21          | 54.55 | 53.64 | 46.40 | 45.80 | 51.81 |
| 22          | 50.00 | 61.00 | 64.44 | 27.30 | 55.25 |
| 23          | 25.86 | 31.43 | 31.00 | 33.40 | 31.29 |
| 24          | 44.18 | 44.30 | 50.08 | 48.33 | 46.45 |
| Mean        | 38.86 | 38.48 | 36.10 | 34.25 | 39.55 |
| SE          | 2.67  | 2.42  | 2.23  | 2.02  | 2.05  |
